# Supplementary material for: Ellipsoidal analysis of coordination polyhedra
Source: PubMed Central journal article supplement (PMC5296646; doi:10.1038/ncomms14235), 2017-02-01
Supplement: ncomms14235-s1.pdf [file ncomms14235-s1.pdf]

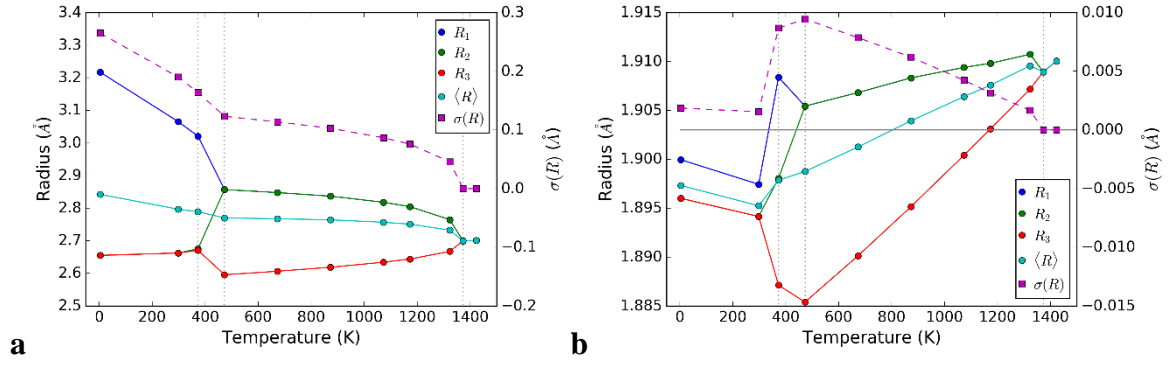

**Supplementary Figure 1. Ellipsoid analysis of structural transitions in CeAlO<sub>3</sub> perovskite.** (a) and (b) Variations of the ellipsoid radii, their average  $\langle R \rangle$  and standard deviation  $\sigma(R)$  for the CeO<sub>12</sub> and AlO<sub>6</sub> polyhedra respectively in CeAlO<sub>3</sub>. The  $\sigma(R)$  variations at the  $\overline{R3c} \rightarrow \overline{Pm3m}$  transition are similar to those of LaAlO<sub>3</sub>. The  $\overline{I4/mcm} \rightarrow \overline{Imma} \rightarrow \overline{R3c}$  change affects the CeO<sub>12</sub> and AlO<sub>6</sub> polyhedra differently.  $\sigma(R)_{\text{Ce}}$ , equivalent to the AlO<sub>6</sub> tilt angle, shows an additional increase on cooling below the 473 K transition, whereas the AlO<sub>6</sub> octahedra become more regular with a decrease in  $\sigma(R)_{\text{Al}}$ .

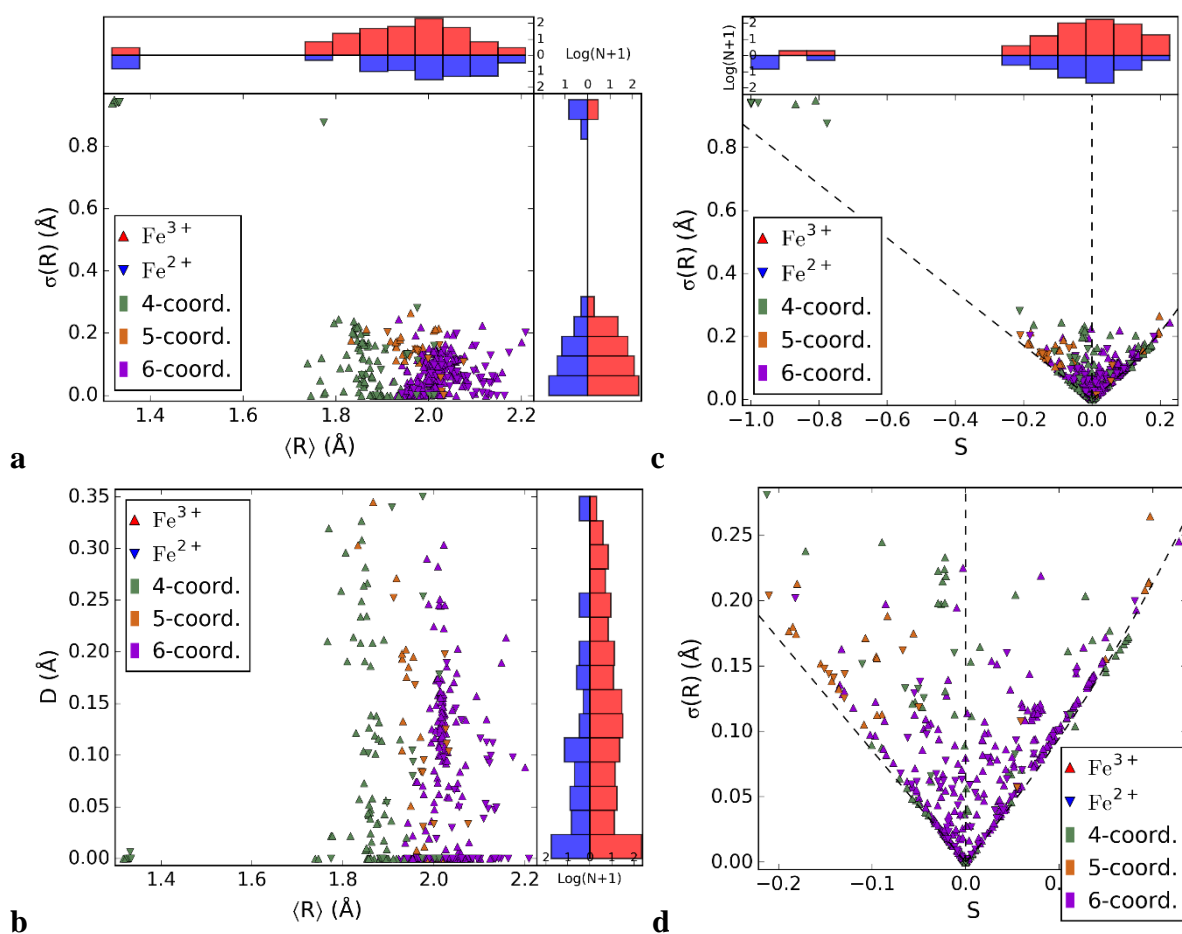

**Supplementary Figure 2. Ellipsoid parameters for  $\text{FeO}_n$  polyhedra.** Plots of ellipsoidal parameters for 499  $\text{FeO}_n$  polyhedra in iron oxides (98 for  $\text{Fe}^{2+}$  and 401 for  $\text{Fe}^{3+}$ ) with Fe coordination numbers between  $n = 4$  and 6 taken from ICSD. Histograms show distributions as  $\log(N+1)$  for  $N$  polyhedra within each interval. **(a)** Standard deviation  $\sigma(R)$  vs. mean ellipsoid radius  $\langle R \rangle$ . **(b)** Displacements  $D$  of the cations from their ellipsoid centres vs.  $\langle R \rangle$ . **(c)**  $\sigma(R)$  vs. shape parameter  $S$  showing limits for oblate ( $S < 0$ ), geometrically scalene ( $S = 0$ ) and prolate ( $S > 0$ ) ellipsoids taking  $R_2 = 1.81 \text{ \AA}$ . **(d)** expansion for plot (c) for the region near  $S = 0$ .

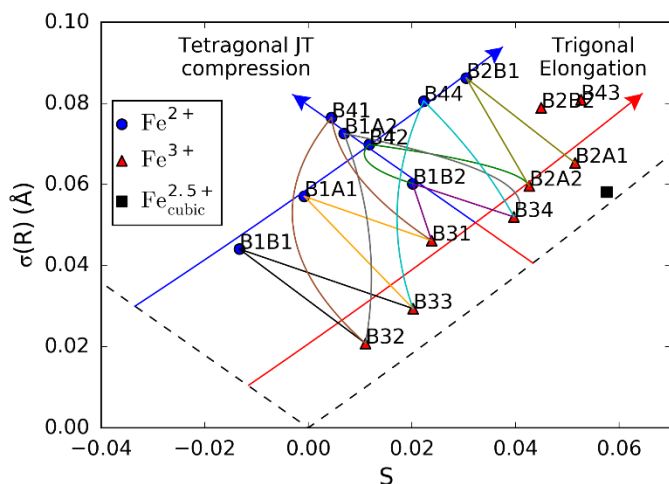

**Supplementary Figure 3. Radius standard deviation  $\sigma(R)$  against shape parameter  $S$  for octahedra in the low temperature structure of magnetite,  $\text{Fe}_3\text{O}_4$ .** Sites are labelled as in ref. 1. Each  $\text{Fe}^{2+}$  is connected to two other cations (usually  $\text{Fe}^{3+}$  ions) forming linear 3-atom trimeron units as shown by the lines. It is notable that the cations within each trimeron generally have similar values of prolate trigonal elongation. These subtle correlated distortions are brought out by the ellipsoidal approach and were not evident in previous analysis of the structure. Two  $\text{Fe}^{3+}$  ions (B2B2 and B43) do not participate in trimeron formation and are offset from the rest of the distribution at the upper right of the plot.

**Supplementary Table 1: Shape parameter sign changes at perovskite phase transitions.**

Low temperature (LT) and high temperature (HT) space groups and signs of the shape parameter  $[s(S)]$  for A and B site ellipsoids at symmetry-disallowed and symmetry-allowed phase transitions between perovskite superstructures are shown.

| Phase               | $T_c$ (K) | Space group |        | $s(S)_A$ |     | $s(S)_B$ |    | Ref.  |
|---------------------|-----------|-------------|--------|----------|-----|----------|----|-------|
|                     |           | LT          | HT     | LT       | HT  | LT       | HT |       |
| Symmetry-disallowed |           |             |        |          |     |          |    |       |
| CeAlO <sub>3</sub>  | 373       | I4/mcm      | Imma   | +        | +   | +        | -  | 2     |
| CeAlO <sub>3</sub>  | 473       | Imma        | R3c    | +        | -   | -        | -  | 2,3   |
| PrAlO <sub>3</sub>  | 205       | Imma        | R3c    | +        | -   | +        | -  | 4     |
| BaCeO <sub>3</sub>  | 673       | Imma        | R3c    | +        | -   | -        | -  | 5,6   |
| LaFeO <sub>3</sub>  | 1228      | Pnma        | R3c    | +        | -   | +        | -  | 7     |
| PrNiO <sub>3</sub>  | 700       | Pnma        | R3c    | +        | -   | +        | -  | 8     |
| LaCrO <sub>3</sub>  | 540       | Pnma        | R3c    | +        | -   | +        | -  | 9     |
| LaGaO <sub>3</sub>  | 425       | Pnma        | R3c    | +        | -   | -        | -  | 10    |
| BaPbO <sub>3</sub>  | 573       | Imma        | I4/mcm | +        | +   | +        | -  | 11    |
| BaTbO <sub>3</sub>  | 280       | Imma        | I4/mcm | +        | +   | +        | -  | 12    |
| CaTiO <sub>3</sub>  | 1498      | Pnma        | I4/mcm | +        | +   | +        | -  | 13    |
| SrHfO <sub>3</sub>  | 870       | Pnma        | Cmcm   | +        | ++  | -        | +  | 14    |
| NaNbO <sub>3</sub>  | 793       | Pbcm        | Cmcm   | - +      | + - | +        | +  | 15,16 |
| BaTiO <sub>3</sub>  | 183       | R3m         | Amm2   | +        | -   | +        | -  | 17    |
| BaTiO <sub>3</sub>  | 278       | Amm2        | P4mm   | -        | +   | -        | +  | 17    |
| Symmetry-allowed    |           |             |        |          |     |          |    |       |
| SrZrO <sub>3</sub>  | 1100      | Cmcm        | I4/mcm | +        | +   | -        | -  | 18    |
| SrHfO <sub>3</sub>  | 1000      | Cmcm        | I4/mcm | ++       | +   | +        | -  | 14    |
| NaNbO <sub>3</sub>  | 848       | Cmcm        | P4/mbm | + -      | +   | +        | -  | 15    |
| NaTaO <sub>3</sub>  | 835       | Cmcm        | P4/mbm | ++       | +   | -        | -  | 19    |
| NaMgF <sub>3</sub>  | 1047      | Pnma        | P4/mbm | +        | +   | +        | -  | 20    |
| BaCeO <sub>3</sub>  | 563       | Pnma        | Imma   | +        | +   | -        | -  | 5,6   |
| PrAlO <sub>3</sub>  | 150       | C2/m        | Imma   | +        | +   | +        | +  | 4     |

## Supplementary Note 1. Symmetry-disallowed transitions in perovskites

Supplementary Table 1 shows signs of the shape parameter  $S$  around symmetry- disallowed and allowed transitions between perovskite superstructures.

CeAlO<sub>3</sub> and PrAlO<sub>3</sub> exhibit reported structural transitions;

I4/mcm (373 K) → Imma (473 K) →  $\bar{R}3c$  (1373 K) → Pm $\bar{3}m$  for CeAlO<sub>3</sub>,<sup>2</sup> and

I2/m (150 K) → Imma (205 K) →  $\bar{R}3c$  (~1860 K) → Pm $\bar{3}m$  for PrAlO<sub>3</sub>.<sup>4</sup>

It is unclear whether the assigned low temperature symmetries of I4/mcm for CeAlO<sub>3</sub> and I2/m for PrAlO<sub>3</sub> are describing the same phase or not, but both materials show a symmetry-disallowed orthorhombic Imma → rhombohedral  $\bar{R}3c$  transition. Thermal variations of the CeAlO<sub>3</sub> ellipsoid radii, their average  $\langle R \rangle$  and standard deviation  $\sigma(R)$  are shown in Supplementary Fig. 1.

Transitions from orthorhombic Pbcn or Pnma symmetry to Cmcm are more complex as the latter structure has two independent A cation sites, but changes in either  $s(S)_A$  or  $s(S)_B$  are still observed.

## Supplementary Note 2. Iron Oxides

Ellipsoidal analysis provides a useful approximation for comparing the distortions and shapes of polyhedra independent of coordination number and geometry. These aspects are illustrated with reference to iron oxide polyhedra from 390 structures in the ICSD (499 polyhedra in total) where 98  $\text{Fe}^{2+}$  and 401  $\text{Fe}^{3+}$  sites have coordination numbers between 4 and 6. Plots and histograms are in Supplementary Fig. 2 and summary versions of the plots are in Fig. 4.

Supplementary Figs. 2a and 2b show plots of ellipsoid standard deviation  $\sigma(R)$  against mean radius  $\langle R \rangle$  and shape parameter  $S$ . The  $\sigma(R)$  vs.  $\langle R \rangle$  distribution in Supplementary Fig. 2a shows a large cluster of points at  $\langle R \rangle \approx d$  and  $\sigma(R) \approx 0$ , where  $d$  is an average Fe-O distance, corresponding to the large number of reported regular tetrahedra and octahedra. Ideal values based on 6-coordinate ionic radii are  $d = 2.18$  and  $2.05 \text{ \AA}$  for high spin  $\text{Fe}^{2+}$  and  $\text{Fe}^{3+}$  respectively, and the displacement between the histograms shown reflects this size difference.  $\text{Fe}^{3+}$  is often found in tetrahedral environments as shown by the collection of points near  $d \approx 1.85 \text{ \AA}$ . The  $\sigma(R)$  vs.  $\langle R \rangle$  plot draws attention to highly anisotropic polyhedra which have  $\langle R \rangle$  values far from  $d$  and large values of  $\sigma(R)$ .  $\text{FeO}_4$  square planes have  $\langle R \rangle = (2/3)d \approx 1.4 \text{ \AA}$  and  $\sigma(R) = (\sqrt{2}/3)d \approx 1.0 \text{ \AA}$ , and the cluster of points at  $\sigma(R) > 0.8 \text{ \AA}$  show this coordination, with flat square planes at  $\langle R \rangle \approx 1.4 \text{ \AA}$  and a more distorted variant at  $\langle R \rangle = 1.8 \text{ \AA}$  on Supplementary Fig. 2a.

The magnitudes  $D$  of the displacement vector for Fe relative to the ellipsoid centre of  $\text{FeO}_n$  polyhedra are plotted against  $\langle R \rangle$  in Supplementary Fig. 2b. The off-centre  $d^5$  effect is apparent but is seen more clearly for the analysis of 6-coordinate polyhedra in Fig. 5c, as described in the main paper.

The plot of  $\sigma(R)$  vs. ellipsoid shape  $S$  in Supplementary Figs. 2c and 2d is another useful way to observe the spectrum of iron oxide polyhedra.  $S$  varies from near -1 for square planar complexes in the oblate distortion limit through many distorted and regular tetrahedra and octahedra at  $S \approx -0.2$  to  $0.3$  (the distribution for  $\text{FeO}_6$  polyhedra alone is in Fig. 5e). The V-shaped appearance of the distribution results from the most symmetric ellipsoid shapes imposing lower limits on  $\sigma(R)$ ; oblate coordinations have  $\sigma(R) = -(\sqrt{2}/3)R_2S$  while prolate ellipsoids have  $\sigma(R) = (\sqrt{2}/3)R_2S/(1-S)$ . These limits are shown on the plot taking the median ellipsoid radius to be  $R_2 = 1.81 \text{ \AA}$ . The line for geometrically scalene ellipsoids, which have  $S = 0$  but are non-spherical with  $R_3/R_2 = R_2/R_1$  is also shown. This coordination with two long, two medium, and two short Fe-O bonds is rather rare compared to oblate and prolate coordinations.

The  $\sigma(R)$  vs. ellipsoid shape  $S$  plot for magnetite in Fig. 4f shows remarkable structure giving insights into the electronic distortion. The same plot is reproduced as Supplementary Fig. 3 to show how distortions within trimerons are correlated.

## Supplementary References

- 1 Senn, M. S., Wright, J. P. & Attfield, J. P. Charge order and three-site distortions in the Verwey structure of magnetite. *Nature* **481**, 173-176 (2012).
- 2 Fu, W. & IJdo, D. "Unusual" phase transitions in CeAlO<sub>3</sub>. *J. Solid State Chem.* **179**, 2732-2738 (2006).
- 3 Howard, C. J., Kennedy, B. J. & Chakoumakos, B. C. Neutron powder diffraction study of rhombohedral rare-earth aluminates and the rhombohedral to cubic phase transition. *J. Phys.: Condens. Matter* **12**, 349-365 (2000).
- 4 Carpenter, M. A., Howard, C. J., Kennedy, B. J. & Knight, K. S. Strain mechanism for order-parameter coupling through successive phase transitions in PrAlO<sub>3</sub>. *Phys. Rev. B* **72**, 024118 (2005).
- 5 Knight, K. Structural phase transitions in BaCeO<sub>3</sub>. *Solid State Ionics* **74**, 109-117 (1994).
- 6 Knight, K. Structural phase transitions, oxygen vacancy ordering and protonation in doped BaCeO<sub>3</sub>: results from time-of-flight neutron powder diffraction investigations. *Solid State Ionics* **145**, 275-294 (2001).
- 7 Selbach, S. M., Tolchard, J. R., Fossdal, A. & Grande, T. Non-linear thermal evolution of the crystal structure and phase transitions of LaFeO<sub>3</sub> investigated by high temperature X-ray diffraction. *J. Solid State Chem.* **196**, 249-254 (2012).
- 8 Huang, T., Parrish, W., Toraya, H., Lacorre, P. & Torrance, J. High-temperature crystal structures of orthorhombic and rhombohedral PrNiO<sub>3</sub>. *Mater. Res. Bull.* **25**, 1091-1098 (1990).
- 9 Oikawa, K., Kamiyama, T., Hashimoto, T., Shimojyo, Y. & Morii, Y. Structural Phase Transition of Orthorhombic LaCrO<sub>3</sub> Studied by Neutron Powder Diffraction. *J. Solid State Chem.* **154**, 524-529 (2000).
- 10 Marti, W., Fischer, P., Altorfer, F., Scheel, H. J. & Tadin, M. Crystal structures and phase transitions of orthorhombic and rhombohedral RGaO<sub>3</sub> (R=La, Pr, Nd) investigated by neutron powder diffraction. *J. Phys.: Condens. Matter* **6**, 127-135 (1994).
- 11 Fu, W., Visser, D., Knight, K. & IJdo, D. High-resolution neutron powder diffraction study on the phase transitions in BaPbO<sub>3</sub>. *J. Solid State Chem.* **180**, 1559-1565 (2007).
- 12 Fu, W., Visser, D., Knight, K. & IJdo, D. Temperature-induced phase transitions in BaTbO<sub>3</sub>. *J. Solid State Chem.* **177**, 1667-1671 (2004).
- 13 Ali, R. & Yashima, M. Space group and crystal structure of the Perovskite CaTiO<sub>3</sub> from 296 to 1720 K. *J. Solid State Chem.* **178**, 2867-2872 (2005).
- 14 Kennedy, B. J., Howard, C. J. & Chakoumakos, B. C. High-temperature phase transitions in SrHfO<sub>3</sub>. *Phys. Rev. B* **60**, 2972-2975 (1999).
- 15 Darlington, C. N. W. & Knight, K. S. High-temperature phases of NaNbO<sub>3</sub> and NaTaO<sub>3</sub>. *Acta Crystallogr.* **B55**, 24-30 (1999).
- 16 Johnston, K. E., Tang, C. C., Parker, J. E., Knight, K. S., Lightfoot, P. & Ashbrook, S. E. The Polar Phase of NaNbO<sub>3</sub>: A Combined Study by Powder Diffraction, Solid-State NMR, and First-Principles Calculations. *J. Am. Chem. Soc.* **132**, 8732-8746 (2010).
- 17 Kwei, G. H., Lawson, A. C. & Billinge, S. J. L. Structures of the Ferroelectric Phases of Barium Titanate. *J. Phys. Chem.* **97**, 2368-2377 (1993).

- 18 Kennedy, B. J., Howard, C. J. & Chakoumakos, B. C. High-temperature phase transitions in SrZrO<sub>3</sub>. *Phys. Rev. B* **59**, 4023-4027 (1999).
- 19 Kennedy, B. J., Prodjosantoso, A. K. & Howard, C. J. Powder neutron diffraction study of the high temperature phase transitions in NaTaO<sub>3</sub>. *J. Phys.: Condens. Matter* **11**, 6319-6327 (1999).
- 20 Knight, K. S., Price, G. D., Stuart, J. A. & Wood, I. G. High-temperature structural phase transitions in neighborite: a high-resolution neutron powder diffraction investigation. *Phys. Chem. Minerals* **42**, 45-52 (2014).
